# Supplementary material for: Rational design of efficient deep eutectic solvents for HCl absorption through their competitive H-bonding interactions
Source: Royal Society of Chemistry journal article supplement (doi:10.1039/d2cp03418b), 2022-01-01
Supplement: d2cp03418b1.pdf [file d2cp03418b1.pdf]

# Electronic Supplementary Information

## Rational design of efficient deep eutectic solvents for HCl absorption through their competitive H-bonding interaction

Lin Feng <sup>a, b</sup>, Shuyi Li <sup>a, b</sup>, Chunxi Li\* <sup>a, b, c</sup>, Hong Meng <sup>d</sup>, Yingzhou Lu <sup>b</sup>, Hongwei

Fan <sup>b</sup>

*a. State Key Laboratory of Chemical Resource Engineering*

*b. College of Chemical Engineering*

*c. Beijing Key Laboratory of Energy Environmental Catalysis,*

*Beijing University of Chemical Technology, Beijing 100029, P. R. China*

*d. State Key Laboratory of Chemistry and Utilization of Carbon Based Energy*

*Resources, Xinjiang University, Urumqi, 830046, P.R. China,*

*\*Corresponding author E-mail address: licx@mail.buct.edu.cn*

## Contents

**Fig. S1 Experimental apparatus for HCl solubility measurement**

**Fig. S2 Optimized structure of components in the system**

**Fig. S3 The picture of phase change before and after HCl absorption by BmimCl**

**Fig. S4 The picture of BmimCl-Thiourea (1:1) during HCl absorption**

**Fig. S5 The phase change of BmimCl-TAA (1:1) in absorption process of HCl gas**

**Fig. S6 Thermal stability of BmimCl-TAA (1:1)**

**Fig. S7 NMR spectra of the BmimCl-TAA (1:1) before and after regeneration.**

**Fig. S8 Optimized configurations and Gibbs free energies for BmimCl-TAA+HCl and BmimCl-HCl +TAA.**

**Table S1 Effect of properties of DESs on saturated and reversible solubility of HCl**

**Table S2 Densities and viscosities of BmimCl-DESs at 298.15 K**

**Table S3 The regression parameters for HCl absorption isothermal data with PCAM model**

**Table S4 Changes of thermodynamic parameters and interatomic distance during HCl absorption**

## Figures and Tables

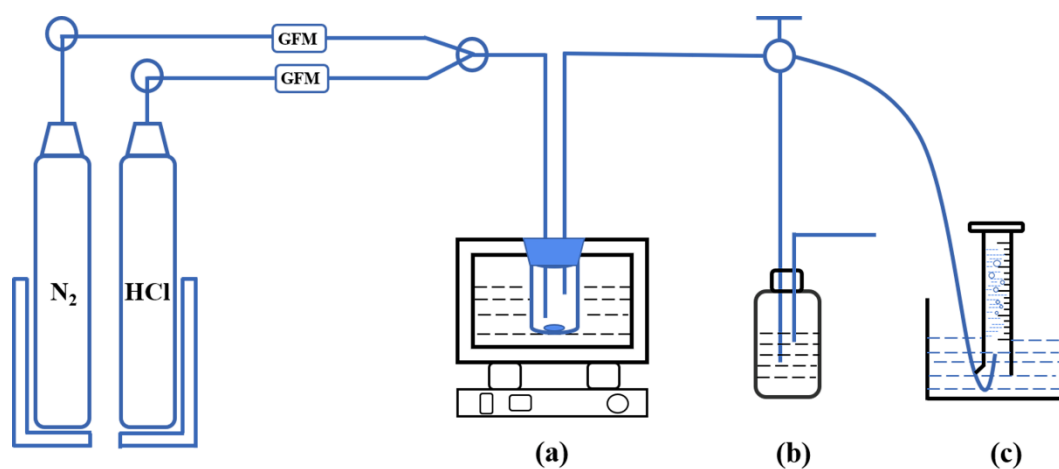

Fig. S1. Experimental apparatus for HCl solubility measurement

(a): absorption vessel; (b): exhaust gas treatment device; (c): gas collect device

The HCl absorption and DES regeneration were carried out in a glass tube with inner diameter of 15 mm, being immersed in a thermostatic water bath at set temperature. For absorption, about 1 g of DES solvent was added to the tube, to which HCl-bearing gas was bubbled at  $60 \text{ mL} \cdot \text{min}^{-1}$ . The absorbed amount of HCl at specified time was determined by weighing the absorption tube with an electronic balance (Sartorius BS 224S, uncertainty of 0.1 mg).

(a)

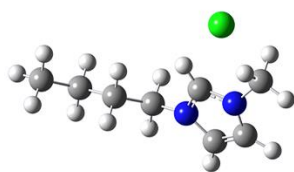

BmimCl

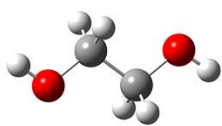

EG

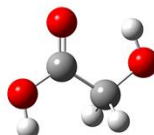

GA

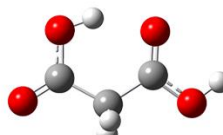

MA

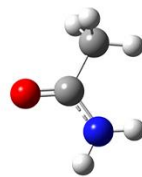

AA

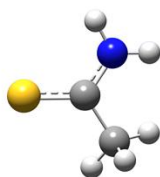

TAA

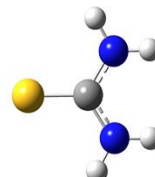

Thiourea

(b)

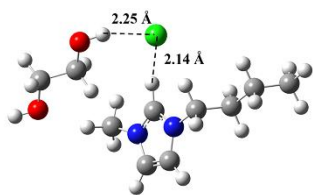

BmimCl-EG

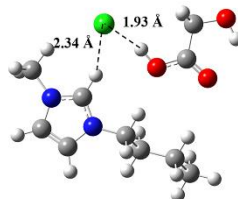

BmimCl-GA

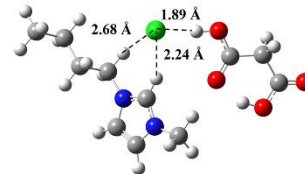

BmimCl-MA

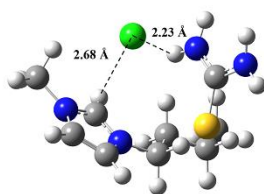

BmimCl-AA

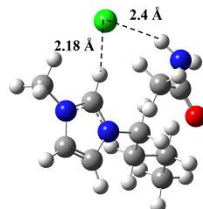

BmimCl-TAA

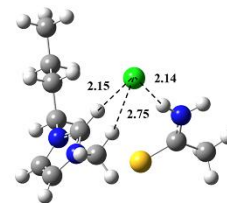

BmimCl-Thiourea

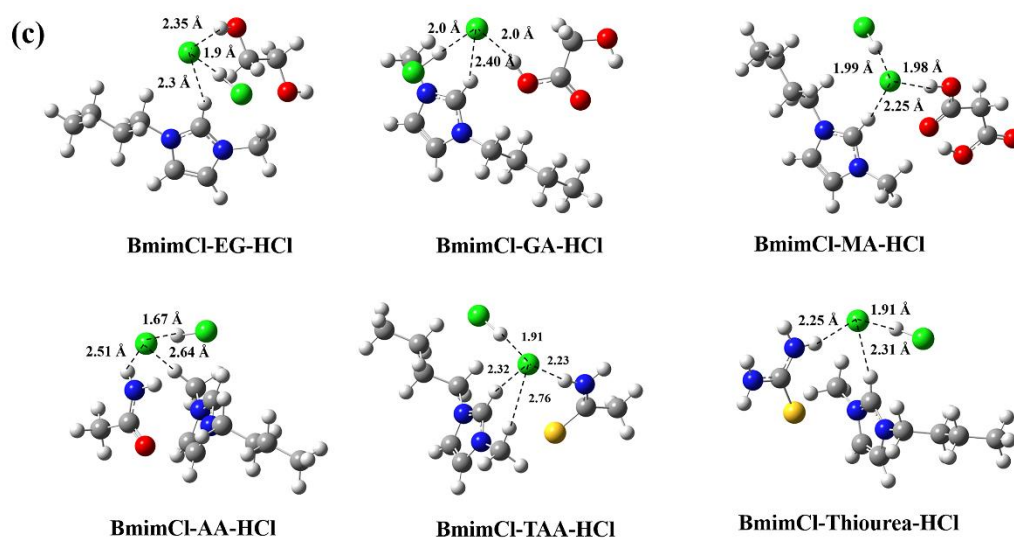

Fig. S2. Optimized structure of components in the system;

(a) HBA/HBD; (b) DES; (c) DES-HCl; S-yellow, N-blue, O-red, C-gray, H-white, Cl-green.

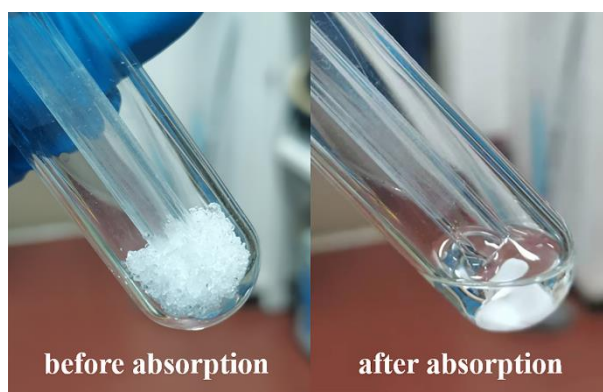

Fig. S3. The picture of phase change before and after HCl absorption by BmimCl

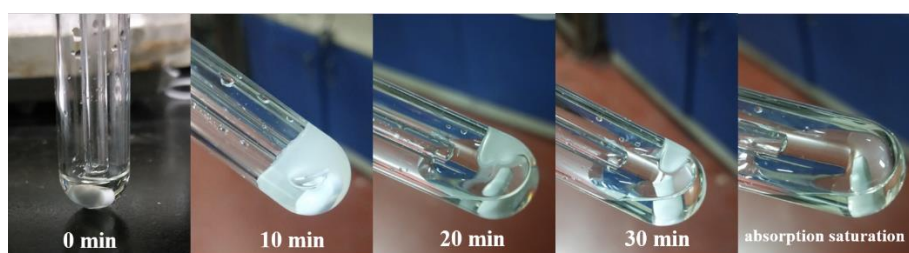

Fig. S4. The picture of BmimCl-Thiourea (1:1) during HCl absorption

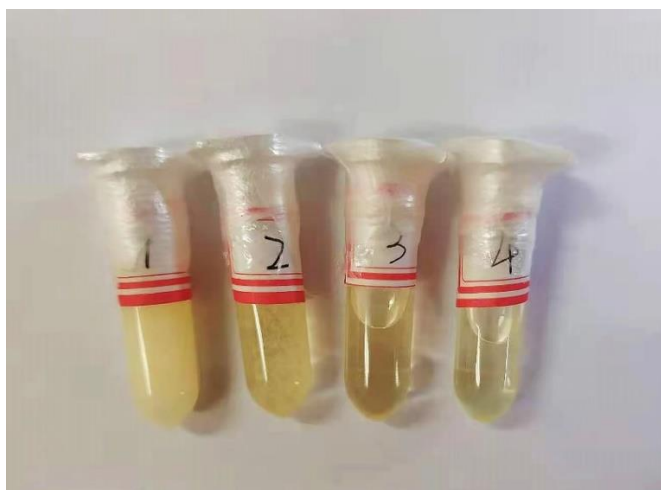

Fig. S5. The phase change of BmimCl-TAA (1:1) in absorption process of HCl gas

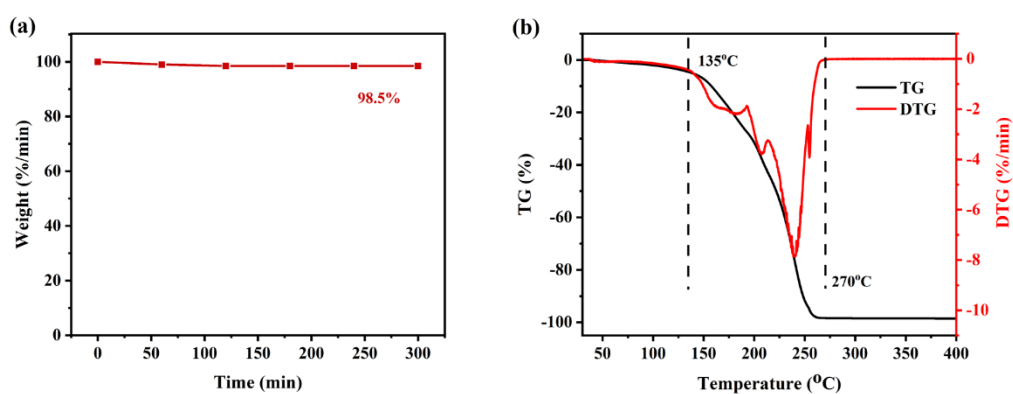

Fig. S6. (a) Thermal stability of BmimCl-TAA (1:1) at 373.15 K; (b) Thermogravimetric diagram of BmimCl-TAA (1:1)

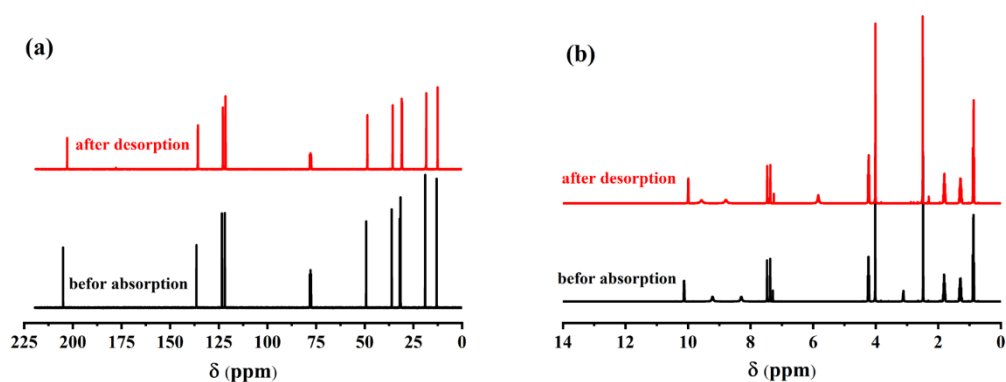

Fig. S7. NMR spectra of the BmimCl-TAA (1:1) before and after regeneration.

(a)  $^{13}\text{C}$  NMR; (b)  $^1\text{H}$  NMR

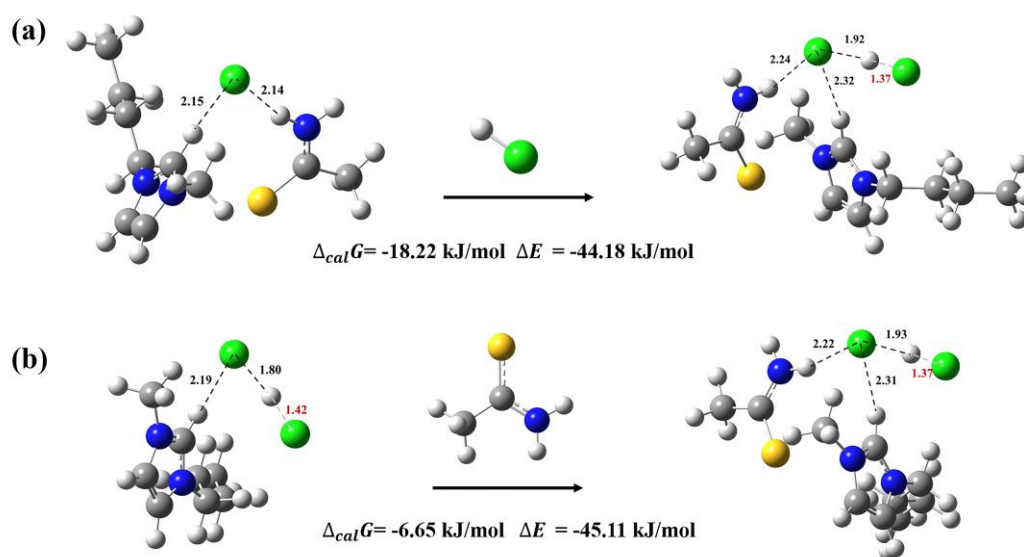

Fig. S8. Optimized configurations and Gibbs free energies for BmimCl-TAA+ HCl and BmimCl-HCl +TAA; S-yellow, N-blue, C-gray, H-white, Cl-green.

Table S1 Effect of properties of DESs on saturated and reversible solubility of HCl

| DESs<br>HBA : HBD =1:1 | Interaction energy between different pairs <sup>[a]</sup><br>$\Delta E$ (kJ·mol <sup>-1</sup> ) |         |         | Absorption enthalpy of HCl <sup>[a]</sup><br>$\Delta_{cat}H$ (kJ·mol <sup>-1</sup> ) | Absorption capacity of HCl (mol·mol <sup>-1</sup> )(g·g <sup>-1</sup> )<br><sup>[b]</sup> |       | Reversible absorption of HCl (mol·mol <sup>-1</sup> ) <sup>[c]</sup> | Free volume <sup>[d]</sup><br>(cm <sup>3</sup> ·mol <sup>-1</sup> ) (cm <sup>3</sup> ·g <sup>-1</sup> ) |       | pH <sup>[e]</sup> | Regeneration efficiency of DESs (%) <sup>[f]</sup> |
|------------------------|-------------------------------------------------------------------------------------------------|---------|---------|--------------------------------------------------------------------------------------|-------------------------------------------------------------------------------------------|-------|----------------------------------------------------------------------|---------------------------------------------------------------------------------------------------------|-------|-------------------|----------------------------------------------------|
|                        | HBA-HBD                                                                                         | DES-HCl | HBD-HCl |                                                                                      |                                                                                           |       |                                                                      |                                                                                                         |       |                   |                                                    |
| BmimCl-HCl             | --                                                                                              | -62.11  | --      | -68.91                                                                               | 2.11                                                                                      | 0.45  | 1.65                                                                 | 54.04                                                                                                   | 0.319 | 6.91              | 78%                                                |
| BmimCl-EG              | -46.68                                                                                          | -47.04  | -27.42  | -53.07                                                                               | 1.35                                                                                      | 0.417 | 1.30                                                                 | 37.26                                                                                                   | 0.315 | 5.89              | 96%                                                |
| BmimCl-GA              | -94.96                                                                                          | -36.47  | -14.78  | -38.84                                                                               | 1.16                                                                                      | 0.339 | 1.03                                                                 | 35.37                                                                                                   | 0.282 | 2.91              | 89%                                                |
| BmimCl-MA              | -87.77                                                                                          | -32.02  | -19.56  | -36.90                                                                               | 1.08                                                                                      | 0.284 | 0.97                                                                 | 36.37                                                                                                   | 0.261 | 2.45              | 90%                                                |
| BmimCl-AA              | -30.27                                                                                          | -56.33  | -28.86  | -63.29                                                                               | 1.48                                                                                      | 0.461 | 1.26                                                                 | 36.96                                                                                                   | 0.316 | 5.01              | 85%                                                |
| BmimCl-TAA             | -62.80                                                                                          | -44.18  | -20.79  | -49.91                                                                               | 1.81                                                                                      | 0.529 | 1.76                                                                 | 39.80                                                                                                   | 0.319 | 6.43              | 97%                                                |
| BmimCl-Thiourea        | -51.24                                                                                          | -61.66  | -26.13  | -69.03                                                                               | 1.54                                                                                      | 0.454 | 1.16                                                                 | 36.30                                                                                                   | 0.290 | 6.99              | 75%                                                |

[a] Calculated values based on B3LYP/6-31++G (d, p) method.

[b] The absorption was carried out at 303.15 K and 101.3 kPa.

[c] The desorption amount of HCl via 1 h N<sub>2</sub> purge at 160 mL·min<sup>-1</sup> and 343.15 K.

[d] Calculation values based on eqn 2 and eqn 3.

[e] The solution pH for their 1mol·L<sup>-1</sup> aqueous solution

[f] As calculated by eqn 4.



Table S2 Densities and viscosities of BmimCl-DESs at 298.15 K

| parameters                   | BmimCl-EG | BmimCl-GA | BmimCl-MA | BmimCl-AA | BmimCl-TAA | BmimCl-Thiourea |
|------------------------------|-----------|-----------|-----------|-----------|------------|-----------------|
|                              | 1:1       | 1:1       | 1:1       | 1:1       | 1:1        | 1:1             |
| $\eta$ (mPa·s)               | 128.33    | 261.18    | 547.22    | 587.60    | 881.67     | 5483.33         |
| $\rho$ (g·cm <sup>-3</sup> ) | 1.08211   | 1.14646   | 1.18698   | 1.07257   | 1.08871    | 1.14698         |

Table S3 The regression parameters for HCl absorption isothermal data with PCAM model

| Temperature (K) | K      | H(bar) | n    | R <sup>2</sup> |
|-----------------|--------|--------|------|----------------|
| 303.15          | 121.06 | 6.11   | 1.65 | 0.996          |
| 313.15          | 55.17  | 6.68   | 1.5  | 0.993          |
| 323.15          | 27.39  | 8.60   | 1.51 | 0.996          |
| 333.15          | 18     | 9.20   | 1.41 | 0.992          |

Table S4 Changes of thermodynamic parameters and interatomic distance during HCl absorption

| Interaction pair  | Interaction energy<br>of different pairs<br>$\Delta E$ (kJ·mol <sup>-1</sup> ) | Absorption                                                    | Gibbs Free                                                  | $d$ (Å)              |                     |                     |                   |
|-------------------|--------------------------------------------------------------------------------|---------------------------------------------------------------|-------------------------------------------------------------|----------------------|---------------------|---------------------|-------------------|
|                   |                                                                                | enthalpy of HCl<br>$\Delta_{cal}H$<br>(kJ·mol <sup>-1</sup> ) | Energy of HCl<br>$\Delta_{cal}G$<br>(kJ·mol <sup>-1</sup> ) | $d_{\text{Bmim-Cl}}$ | $d_{\text{Cl-TAA}}$ | $d_{\text{Cl-HCl}}$ | $d_{\text{H-Cl}}$ |
| BmimCl            | --                                                                             | --                                                            | --                                                          | 2.63                 | --                  | --                  | --                |
| BmimCl-HCl        | -62.11                                                                         | -68.91                                                        | -33.29                                                      | 2.19                 | --                  | 1.8                 | 1.42              |
| DES (BmimCl-TAA)  | -62.80                                                                         | -64.98                                                        | -22.23                                                      | 2.15                 | 2.14                | --                  | 1.29              |
| DES-1HCl (Cl)     | -44.18                                                                         | -49.91                                                        | -18.23                                                      | 2.32                 | 2.23                | 1.91                | 1.37              |
| DES-1HCl (S)      | -27.81                                                                         | -33.67                                                        | -2.61                                                       | 2.16                 | 2.09                | 2.12                | 1.34              |
| DES-2HCl (Cl)     | -72.18                                                                         | -82.96                                                        | -18.24                                                      | 2.41                 | 2.3                 | 2.03                | 1.34              |
| DES-2HCl (Cl+S)   | -72.08                                                                         | -83.00                                                        | -12.41                                                      | 2.38                 | 2.23                | 1.91                | 1.38              |
| DES-3HCl (2Cl+S)  | -97.10                                                                         | -111.18                                                       | -18.44                                                      | 2.38                 | 2.25                | 2.04                | 1.33              |
| DES-3HCl (Cl)     | -95.06                                                                         | -107.78                                                       | -14.52                                                      | 2.38                 | 2.37                | 2.13                | 1.32              |
| DES-4HCl (3Cl+S)  | -121.04                                                                        | -139.63                                                       | -6.43                                                       | 2.42                 | 2.42                | 2.16                | 1.32              |
| DES-4HCl (Cl)     | -112.64                                                                        | 127.78                                                        | -3.39                                                       | 2.5                  | 2.45                | 2.2                 | 1.31              |
| DES-5HCl (3Cl+2S) | -135.09                                                                        | -156.50                                                       | 6.96                                                        | 2.42                 | 2.32                | 2.16                | 1.32              |
